# Supplementary material
Source: Springer Nature journal article supplement (https://www.springermedizin.de/resource/supplementary/12936_2011_1932_MOESM2_ESM.pdf/9542082)

**a) Chad (n=3111)**

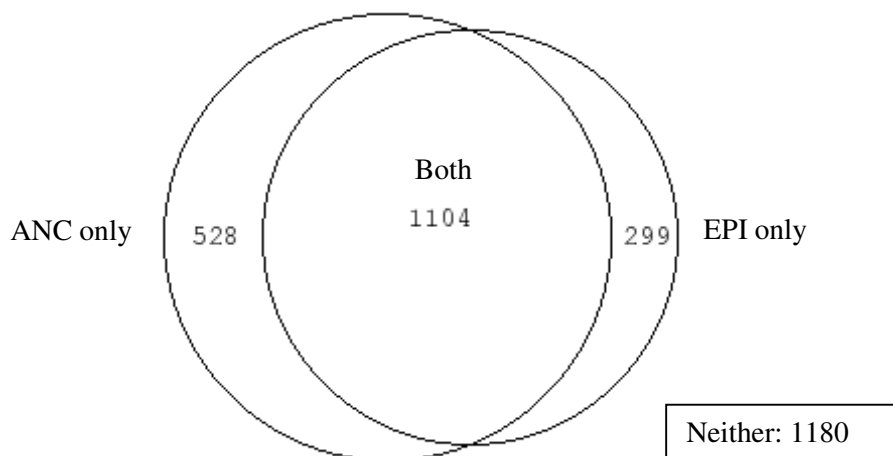

**b) Mali (n=8102)**

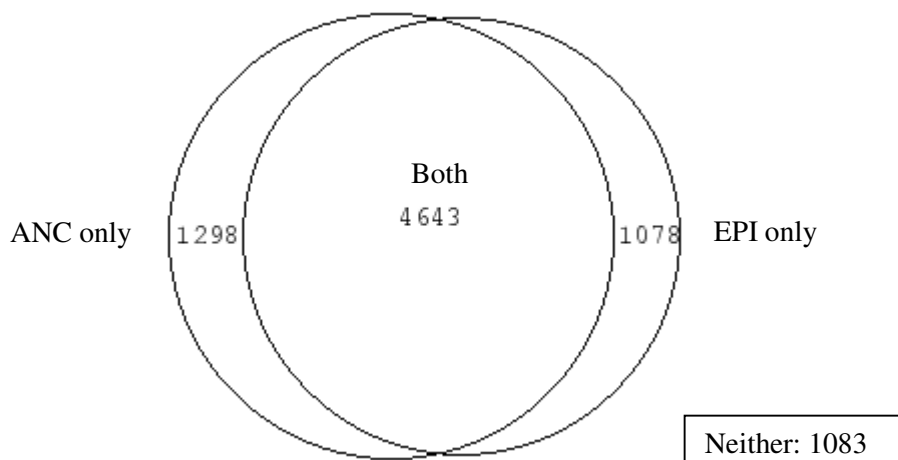

**c) Niger (n=5448)**

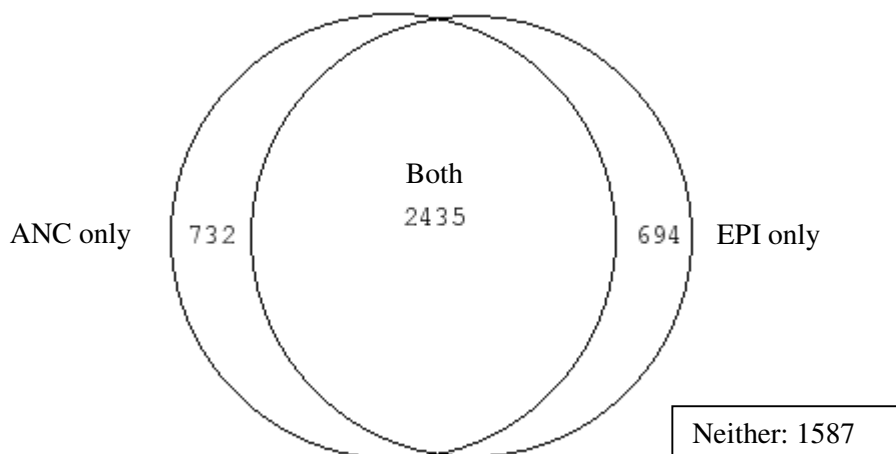

Supplement: MOESM2 [file 9542082]
